# Supplementary material for: Examining the potential impacts of a coastal renourishment project on the presence and abundance of Escherichia coli
Source: PubMed Central journal article supplement (PMC11125542; doi:10.1371/journal.pone.0304061), 2024-05-24
Supplement: pone.0304061.s001.pdf [file pone.0304061.s001.pdf]

**Supporting Information File 1:** Summary of *E. coli* Two-Way ANOVAs with corresponding F-ratios and P values.

| <b>Two-Way ANOVA Summary</b> | <b>F- Ratio</b> | <b>P-Value</b>    |
|------------------------------|-----------------|-------------------|
| Whole Model Summary          | <b>9.1440</b>   | <b>&lt;0.0001</b> |
| Effect of Sub-Section 2014   | <b>17.325</b>   | <b>&lt;0.0001</b> |
| Effect of Renourishment 2014 | 2.8908          | 0.0928            |
| Interactive Effect 2014      | <b>4.312</b>    | <b>0.0165</b>     |
| Whole Model Summary          | 1.349           | 0.2517            |
| Effect of Sub-Section 2015   | 0.550           | 0.5791            |
| Effect of Renourishment 2015 | <b>4.137</b>    | <b>0.0408</b>     |
| Interactive Effect 2015      | 0.465           | 0.6297            |
