# Supplementary material for: Examining the potential impacts of a coastal renourishment project on the presence and abundance of Escherichia coli
Source: PubMed Central journal article supplement (PMC11125542; doi:10.1371/journal.pone.0304061), 2024-05-24
Supplement: pone.0304061.s002.pdf [file pone.0304061.s002.pdf]

**Supporting Information File 2:** Summary of ANOVA Results for Sand Grain Size Analysis with F and P values.

| Year | Category    | Source                      | F-Ratio        | P- Value         |
|------|-------------|-----------------------------|----------------|------------------|
| 2014 | Very Coarse | Renourishment Status        | 0.5341         | 0.4670           |
|      |             | <b>Beach Zone</b>           | <b>5.6972</b>  | <b>0.0048</b>    |
|      |             | Interaction                 | 2.1205         | 0.1265           |
|      | Coarse      | Renourishment Status        | 3.1112         | 0.0815           |
|      |             | <b>Beach Zone</b>           | <b>3.9014</b>  | <b>0.0241</b>    |
|      |             | Interaction                 | 5.3040         | 0.0068           |
|      | Medium      | Renourishment Status        | 0.9642         | 0.3290           |
|      |             | <b>Beach Zone</b>           | <b>4.8916</b>  | <b>0.0098</b>    |
|      |             | Interaction                 | 0.1787         | 0.8367           |
|      | Fine        | Renourishment Status        | 2.3534         | 0.1289           |
|      |             | <b>Beach Zone</b>           | <b>4.5221</b>  | <b>0.0137</b>    |
|      |             | Interaction                 | 1.8569         | 0.1627           |
|      | Very Fine   | <b>Renourishment Status</b> | <b>39.1752</b> | <b>&lt;.0001</b> |
|      |             | <b>Beach Zone</b>           | <b>14.7481</b> | <b>&lt;.0001</b> |
|      |             | <b>Interaction</b>          | <b>7.7007</b>  | <b>0.0009</b>    |
| 2015 | Very Coarse | Renourishment Status        | 0.1817         | 0.1817           |
|      |             | <b>Beach Zone</b>           | <b>9.1014</b>  | <b>0.0003</b>    |
|      |             | Interaction                 | 1.5504         | 0.2189           |
|      | Coarse      | <b>Renourishment Status</b> | <b>17.9049</b> | <b>&lt;.0001</b> |
|      |             | Beach Zone                  | 0.1338         | 0.8749           |
|      |             | <b>Interaction</b>          | <b>4.3277</b>  | <b>0.0164</b>    |
|      | Medium      | Renourishment Status        | 0.7302         | 0.3954           |
|      |             | <b>Beach Zone</b>           | <b>17.7440</b> | <b>&lt;.0001</b> |
|      |             | Interaction                 | 1.9315         | 0.1516           |
|      | Fine        | <b>Renourishment Status</b> | <b>15.7223</b> | <b>0.0002</b>    |
|      |             | Beach Zone                  | 0.7385         | 0.4810           |
|      |             | Interaction                 | 2.8622         | 0.0630           |
|      | Very Fine   | <b>Renourishment Status</b> | <b>25.8260</b> | <b>&lt;.0001</b> |
|      |             | <b>Beach Zone</b>           | <b>3.8613</b>  | <b>0.0251</b>    |
|      |             | <b>Interaction</b>          | <b>6.5285</b>  | <b>0.0024</b>    |
