# Supplementary material for: Examining the potential impacts of a coastal renourishment project on the presence and abundance of Escherichia coli
Source: PubMed Central journal article supplement (PMC11125542; doi:10.1371/journal.pone.0304061), 2024-05-24
Supplement: pone.0304061.s003.pdf [file pone.0304061.s003.pdf]

**Supporting Information File 3:** Summary of sand grain analyses for 2014 samples. Number represents the percentage of the total sand sample belonging to each grain size category. P-values in bold symbolize statistically significant results in the t-tests between the sections.

| <b>Grain Category</b> | <b>Beach Sub-Section</b> | <b>Non-nourished Mean%</b> | <b>Renourished Mean %</b> | <b>t- ratio</b> | <b>P-Value</b>   |
|-----------------------|--------------------------|----------------------------|---------------------------|-----------------|------------------|
| Very Coarse           | Dune                     | 0.251427                   | 2.831388                  | 1.1667          | 0.2467           |
| Coarse                | Dune                     | 3.41045                    | 4.26953                   | 0.1950          | 0.8459           |
| Medium                | Dune                     | 37.78838                   | 35.15669                  | 0.4269          | 0.6705           |
| Fine                  | Dune                     | 54.29176                   | 50.10464                  | 0.6899          | 0.4922           |
| <b>Very Fine</b>      | <b>Dune</b>              | <b>2.60012</b>             | <b>6.26466</b>            | <b>3.7629</b>   | <b>0.0003</b>    |
| <b>Very Coarse</b>    | <b>Intertidal</b>        | <b>1.12265</b>             | <b>6.02131</b>            | <b>2.2153</b>   | <b>0.0295</b>    |
| <b>Coarse</b>         | <b>Intertidal</b>        | <b>2.40758</b>             | <b>14.99676</b>           | <b>2.8572</b>   | <b>0.0054</b>    |
| Medium                | Intertidal               | 46.88611                   | 39.27975                  | 1.2340          | 0.2207           |
| Fine                  | Intertidal               | 42.26409                   | 36.50288                  | 0.9494          | 0.3452           |
| Very Fine             | Intertidal               | 1.31839                    | 2.13611                   | 0.8397          | 0.4035           |
| Very Coarse           | Subtidal                 | 7.876852                   | 6.131349                  | 0.7308          | 0.4670           |
| Coarse                | Subtidal                 | 17.05730                   | 8.66291                   | 1.7639          | 0.0815           |
| Medium                | Subtidal                 | 32.16280                   | 25.62553                  | 0.9819          | 0.3290           |
| Fine                  | Subtidal                 | 39.37203                   | 49.42761                  | 1.5341          | 0.1289           |
| <b>Very Fine</b>      | <b>Subtidal</b>          | <b>2.21236</b>             | <b>8.52954</b>            | <b>6.2590</b>   | <b>&lt;.0001</b> |
