# Supplementary material for: Examining the potential impacts of a coastal renourishment project on the presence and abundance of Escherichia coli
Source: PubMed Central journal article supplement (PMC11125542; doi:10.1371/journal.pone.0304061), 2024-05-24
Supplement: pone.0304061.s004.pdf [file pone.0304061.s004.pdf]

**Supporting Information File 4:** Summary of sand grain analyses for 2015 samples. Number represents the percentage of the total sand sample belonging to each grain size category. P-values in bold symbolize statistically significant results in the t-tests between the sections.

| <b>Grain Category</b> | <b>Beach Sub-Section</b> | <b>Non-nourished Mean%</b> | <b>Renourished Mean %</b> | <b>t- ratio</b> | <b>P-Value</b>   |
|-----------------------|--------------------------|----------------------------|---------------------------|-----------------|------------------|
| Very Coarse           | Dune                     | 1.08550                    | 3.84379                   | 0.8603          | 0.3924           |
| Coarse                | Dune                     | 5.32029                    | 5.14378                   | 0.0915          | 0.9274           |
| Medium                | Dune                     | 72.87759                   | 64.64381                  | 0.8855          | 0.3786           |
| Fine                  | Dune                     | 13.49660                   | 21.19777                  | 1.1772          | 0.2426           |
| Very Fine             | Dune                     | 1.39245                    | 3.40113                   | 1.7017          | 0.0927           |
| Very Coarse           | Intertidal               | 1.13649                    | 3.72375                   | 0.8069          | 0.4223           |
| <b>Coarse</b>         | <b>Intertidal</b>        | <b>3.44438</b>             | <b>7.35194</b>            | <b>2.0247</b>   | <b>0.0462</b>    |
| Medium                | Intertidal               | 80.51045                   | 63.44054                  | 1.8357          | 0.0701           |
| Fine                  | Intertidal               | 9.90847                    | 14.20430                  | 0.6567          | 0.5133           |
| Very Fine             | Intertidal               | 1.75315                    | 1.58419                   | 0.1431          | 0.8865           |
| Very Coarse           | Subtidal                 | 14.52933                   | 9.36292                   | 1.3481          | 0.1817           |
| <b>Coarse</b>         | <b>Subtidal</b>          | <b>2.10013</b>             | <b>9.66064</b>            | <b>4.2314</b>   | <b>&lt;.0001</b> |
| Medium                | Subtidal                 | 34.53268                   | 41.88914                  | 0.8545          | 0.3954           |
| <b>Fine</b>           | <b>Subtidal</b>          | <b>4.25999</b>             | <b>28.27502</b>           | <b>3.9651</b>   | <b>0.0002</b>    |
| <b>Very Fine</b>      | <b>Subtidal</b>          | <b>1.07001</b>             | <b>6.62360</b>            | <b>5.0819</b>   | <b>&lt;.0001</b> |
